# Supplementary material
Source: PubMed Central journal article supplement (PMC5546040)

# Supplemental Data

## Mechanistic details of the mycofactocin biosynthetic protein MftC, a radical-S-adenosylmethionine protein.

*Bulat Khaliullin<sup>1</sup>, Richard Ayikpoe<sup>1</sup>, Mason Tuttle<sup>1</sup>, John A. Latham<sup>1†</sup>*

<sup>1</sup>Department of Chemistry and Biochemistry, University of Denver, Denver, CO 80208, USA.

† Address correspondence to John Latham, Department of Chemistry and Biochemistry, University of Denver, Denver, CO 80208. E-mail: john.latham@du.edu; Tel. +1 303 871 2533; Fax. +1 303 871 2254

**Figure S1.** Mass spectra of (A) MftA M1W purified peptide, (B) MftA M1W product 1 (MftA\*) and (C) MftA M1W product 2 (MftA\*\*). All collected spectral data are represented in black and the predicted spectra for the MH<sup>3+</sup> ions are shown in red.

**Figure S2.** Mass spectrum of (A) <sup>13</sup>C<sub>9</sub>, <sup>15</sup>N tyrosine labeled MftA M1W purified peptide and (B) purified <sup>13</sup>C<sub>9</sub>, <sup>15</sup>N tyrosine labeled MftA M1W\*. All collected spectral data are represented in black and the predicted spectra for the MH<sup>3+</sup> ions are shown in red.

**Figure S3.** <sup>13</sup>C NMR spectra for (A) unreacted <sup>13</sup>C<sub>9</sub>, <sup>15</sup>N tyrosine labeled MftA M1W and (B) the <sup>13</sup>C<sub>9</sub>, <sup>15</sup>N tyrosine labeled MftA M1W\* product. <sup>1</sup>H NMR spectra for (C) unreacted MftA M1W and (D) the MftA M1W\* product.

**Figure S4.** <sup>13</sup>C NMR spectra for (A) *Z*-L-Val-*p*-(2-aminoethenyl)phenol and (B) *E*-L-Val-*p*-(2-aminoethenyl)phenol. <sup>1</sup>H NMR spectra for (C) *Z*-L-Val-*p*-(2-aminoethenyl)phenol and (D) *E*-L-Val-*p*-(2-aminoethenyl)phenol.

**Figure S5.** UV-Vis spectra for (red) *E*-L-Val-*p*-(2-aminoethenyl)phenol (140 μM) and (blue) *Z*-L-Val-*p*-(2-aminoethenyl)phenol (110 μM).

**Figure S6.** Mass spectrum of (A) MftA M1W/V29A purified peptide, (B) MftA M1W/V29A\*\*. All collected spectral data are represented in black and the predicted spectra for the MH<sup>3+</sup> ions are shown in red. (C) <sup>1</sup>H NMR spectra for reacted MftA M1W/V29A\*\*.

**Figure S7.** Mass spectrum of (A) tyrosine Ring-2,6-D<sub>2</sub>, 2-D MftA M1W (C<sub>α</sub>-labeled), (B) tyrosine 3,3-2D, MftA M1W (C<sub>β</sub>-labeled).

**Scheme S1.** Reaction scheme for the synthesis of *Z*-L-Val-*p*-(2-aminoethenyl)phenol.

**Scheme S2.** Reaction scheme for the synthesis of *E*-L-Val-*p*-(2-aminoethenyl)phenol.

Figure S1.

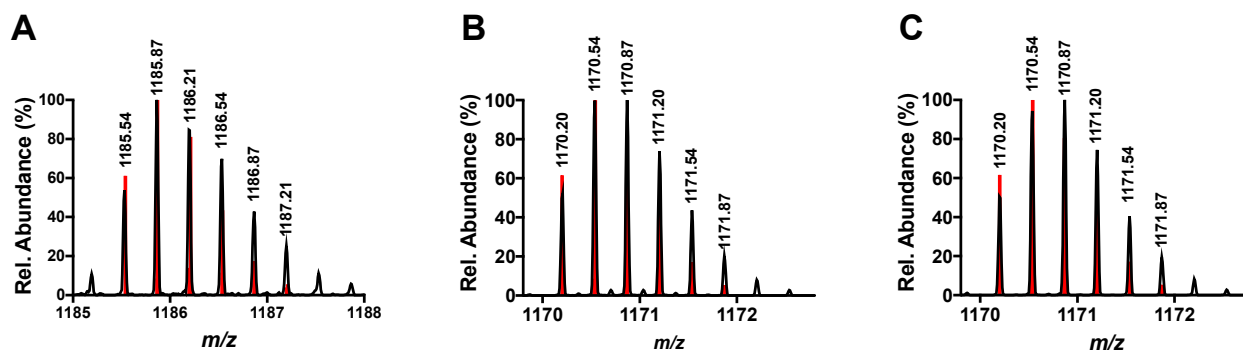

Figure S2.

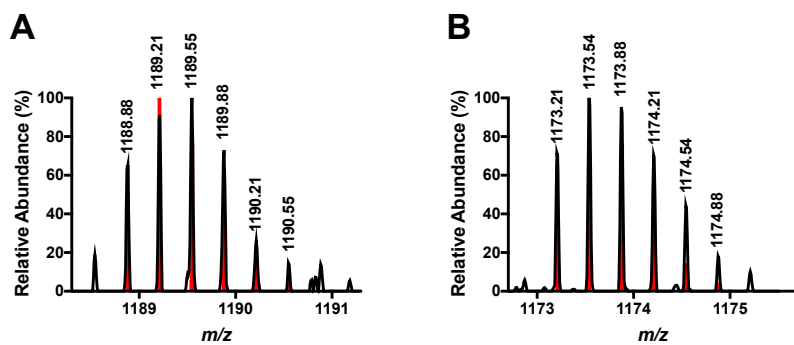

Figure S3.

A.

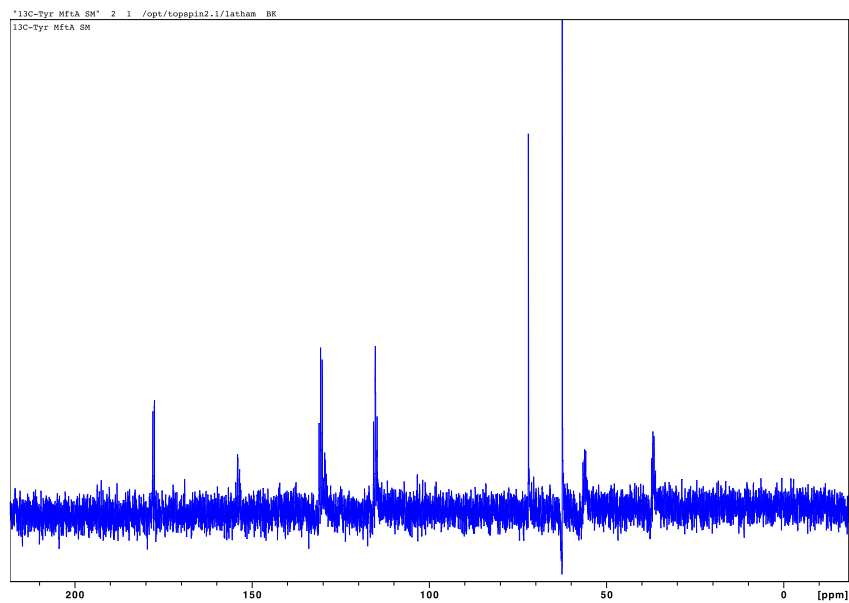

**B.**

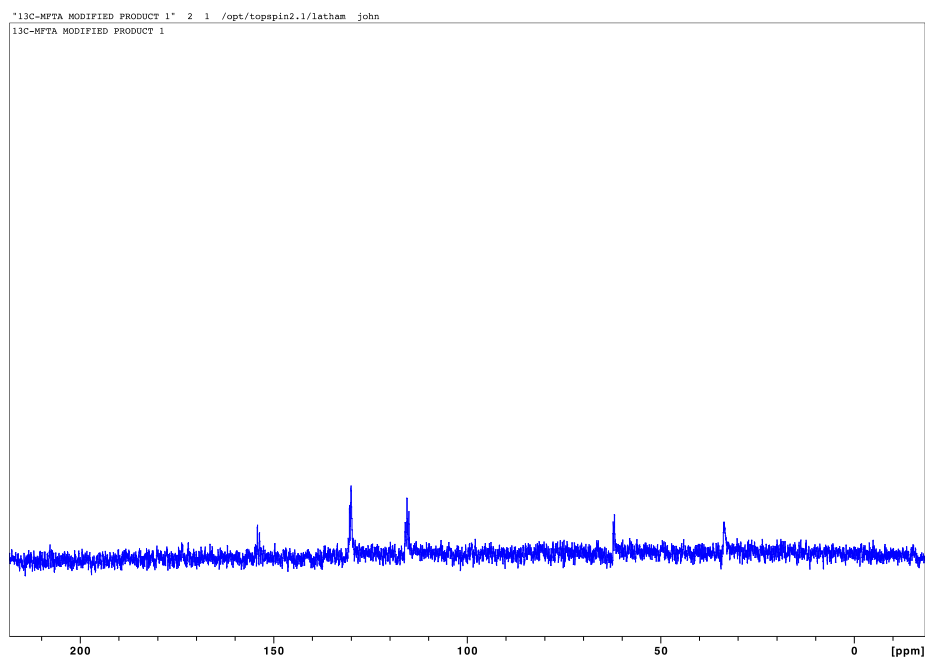

**C.**

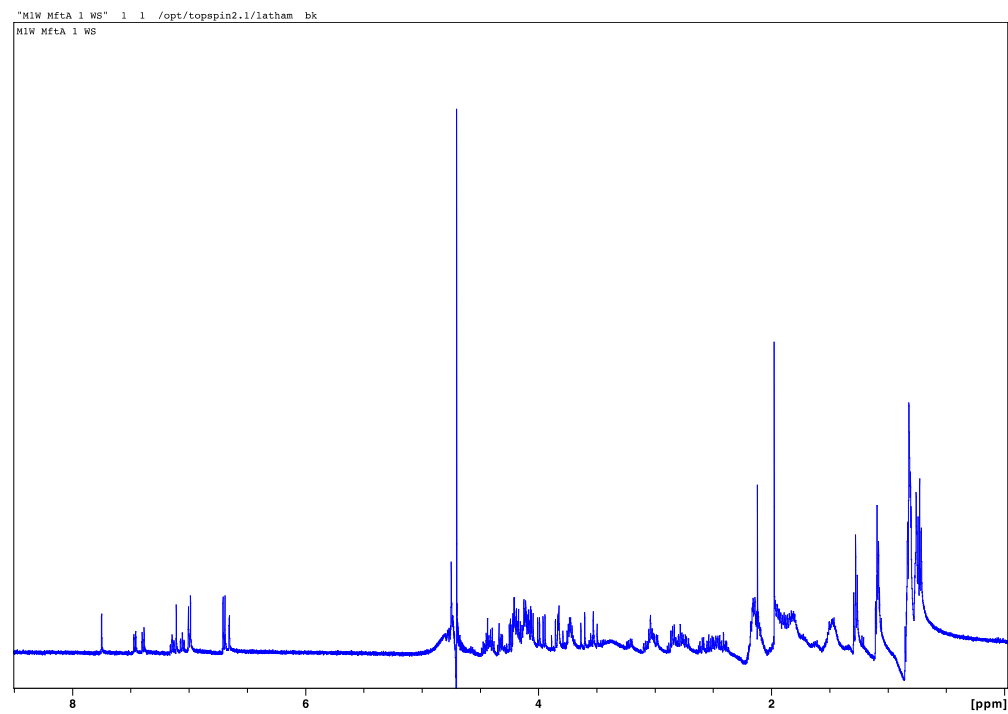

D.

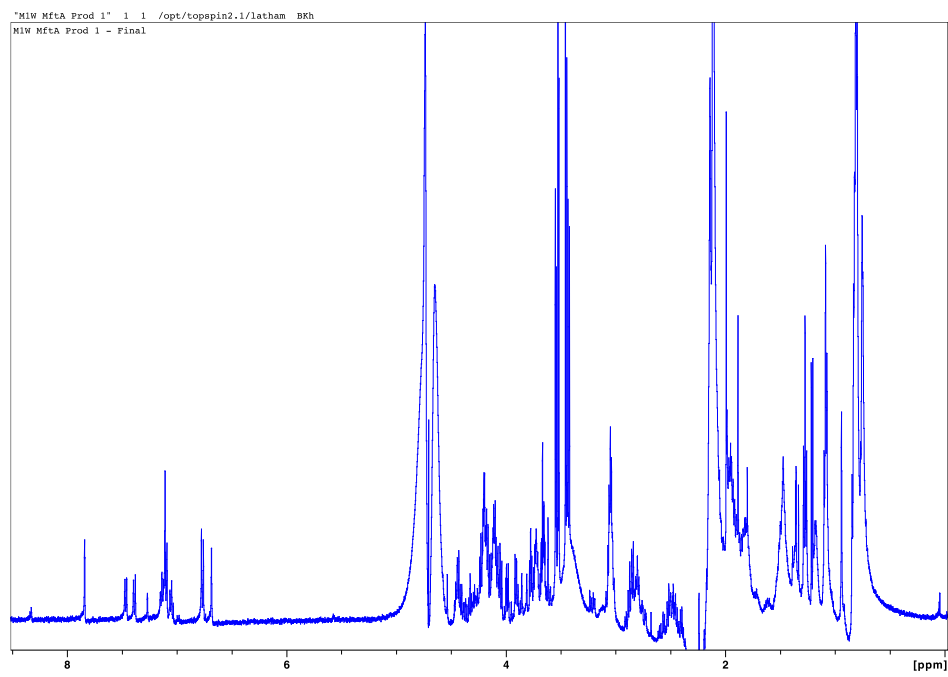

Figure S4.

A.

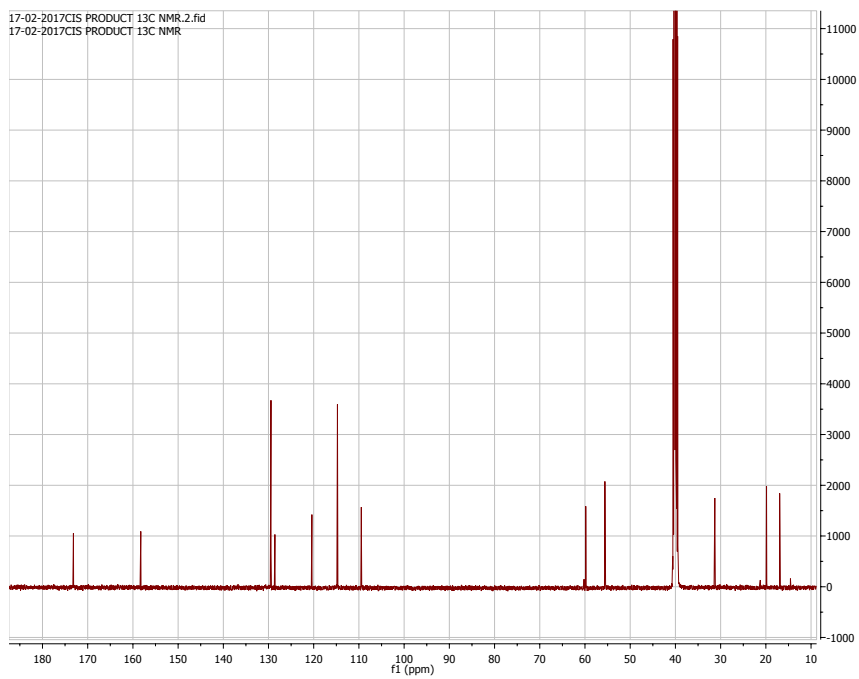

### B.

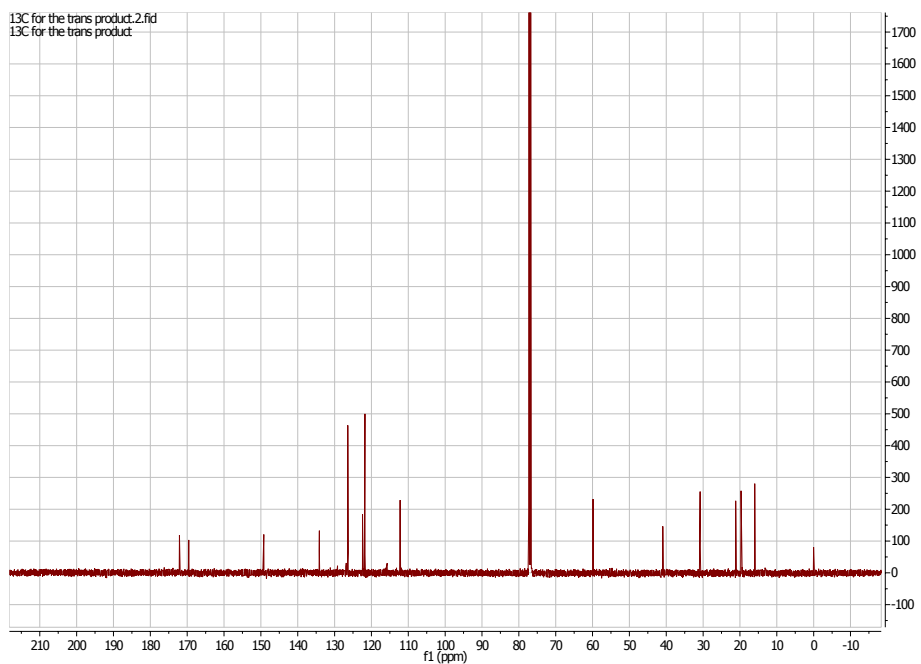

### C.

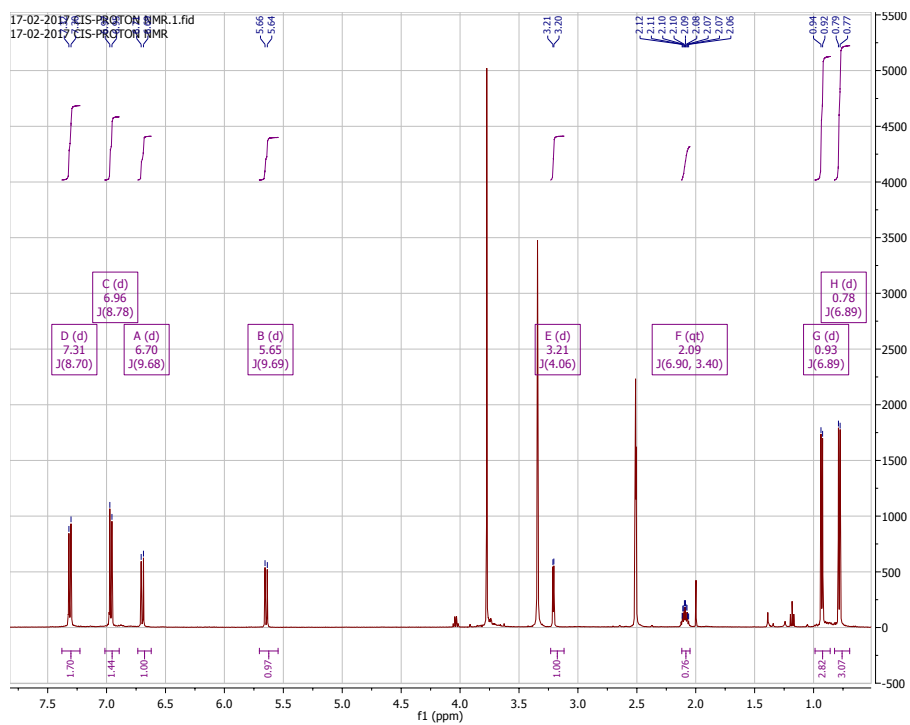

D.

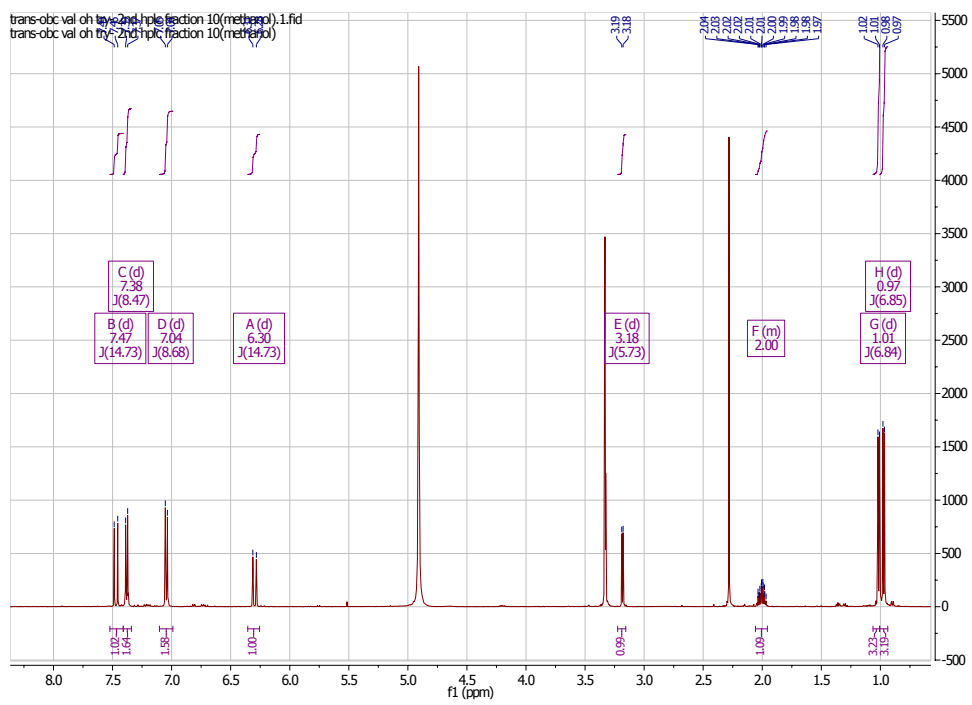

Figure S5.

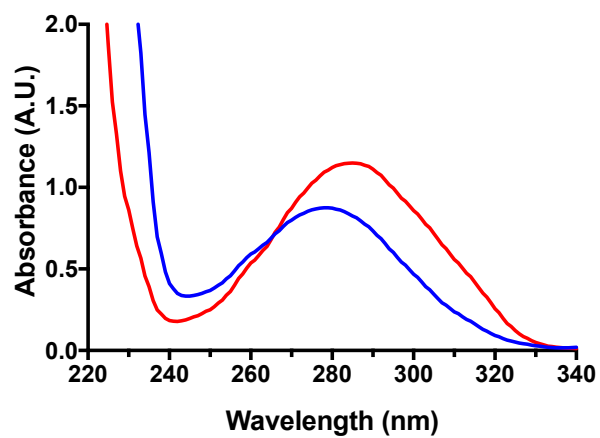

Figure S6

**A**

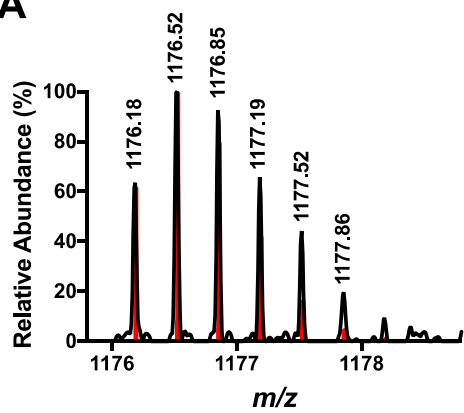

**B**

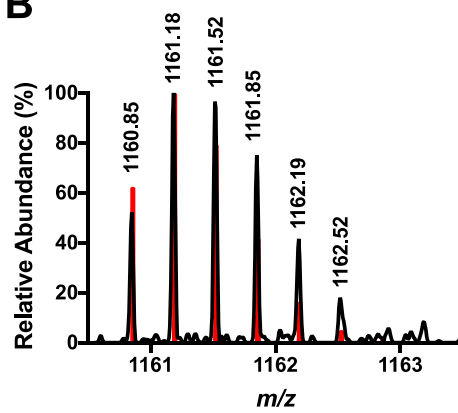

**C**

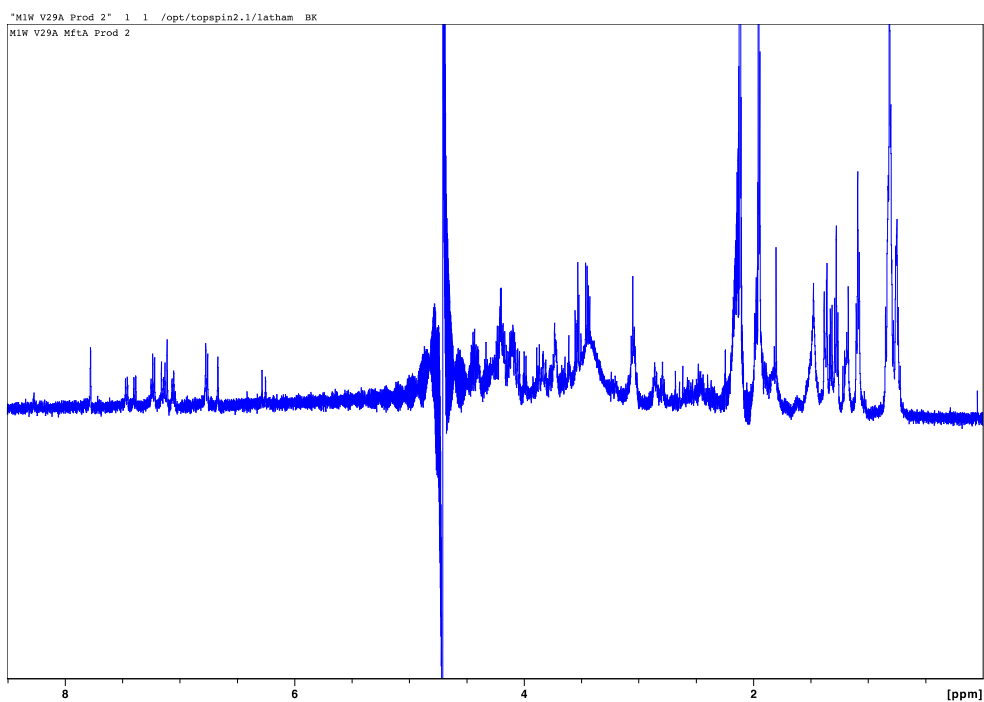

Figure S7.

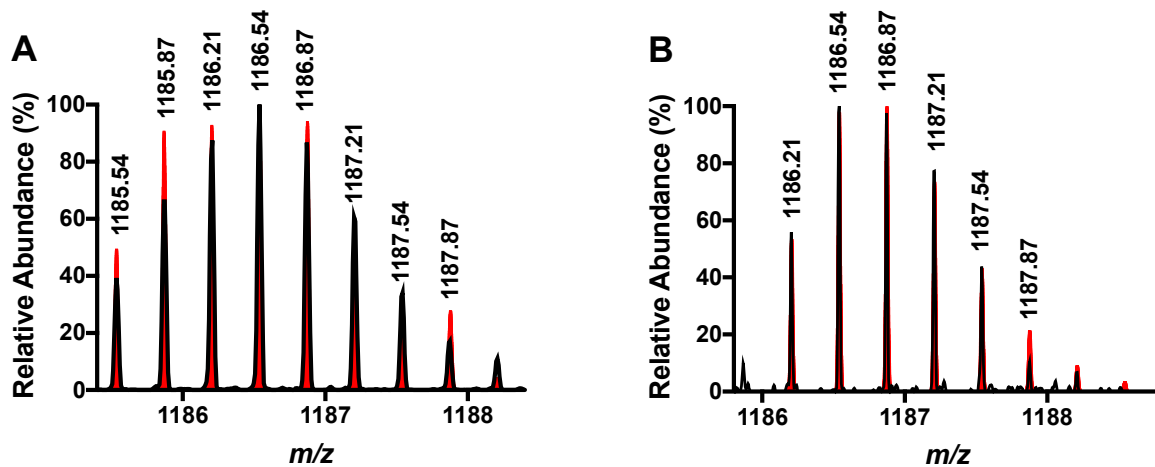

Scheme S1.

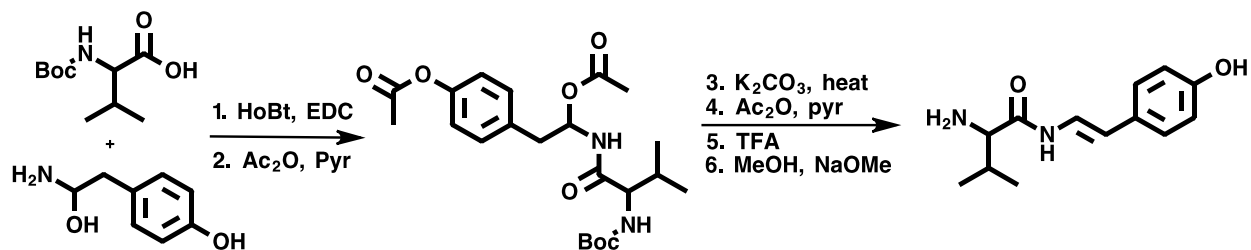

Scheme S2.

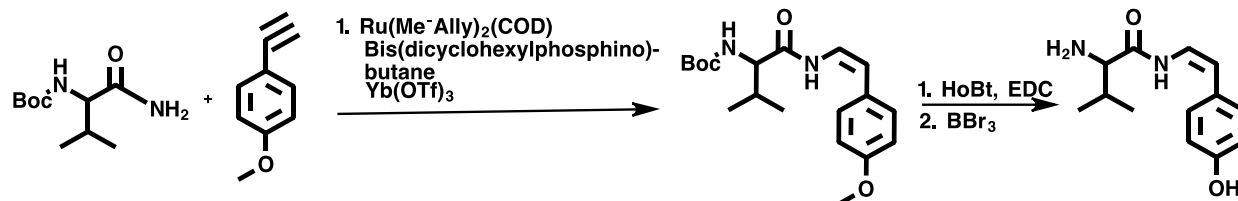

Supplement: 10.1074_M117.795682_jbc.M117.795682-1.pdf [file 10.1074_M117.795682_jbc.M117.795682-1.pdf]
